# Supplementary material for: Variational Assimilation of Streamflow Observations in ImprovingMonthly Streamflow Forecasting
Source: Copernicus journal article supplement (doi:10.5194/hess-2019-288), 2019-07-11
Supplement: Supplementary file 1 [file hess-2019-288-supplement.pdf]

# **SUPPLEMENTARY MATERIAL**

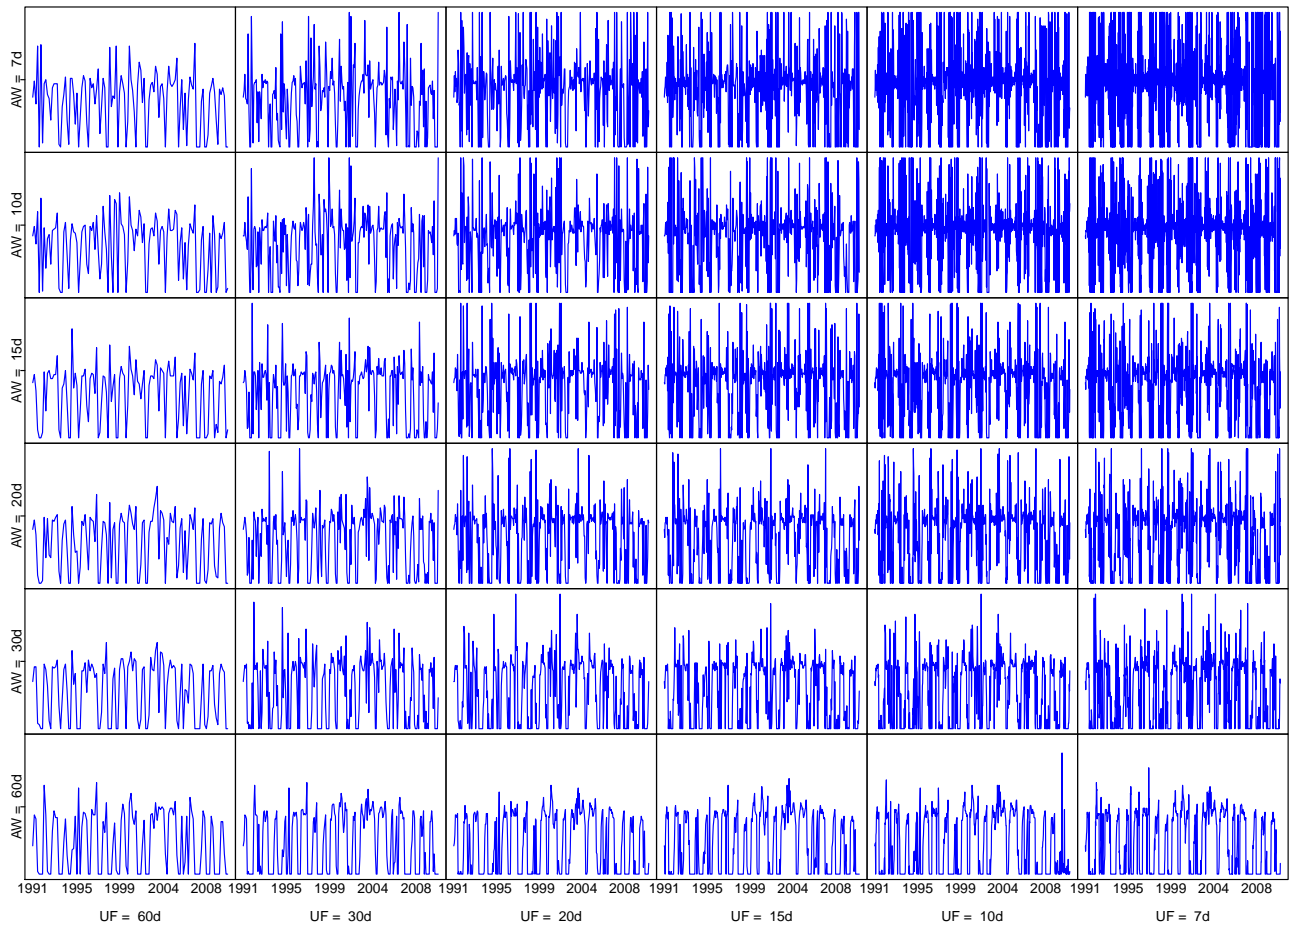

Figure S1. Time series of optimal  $K^*$  during 20 years of simulations under different schemes.

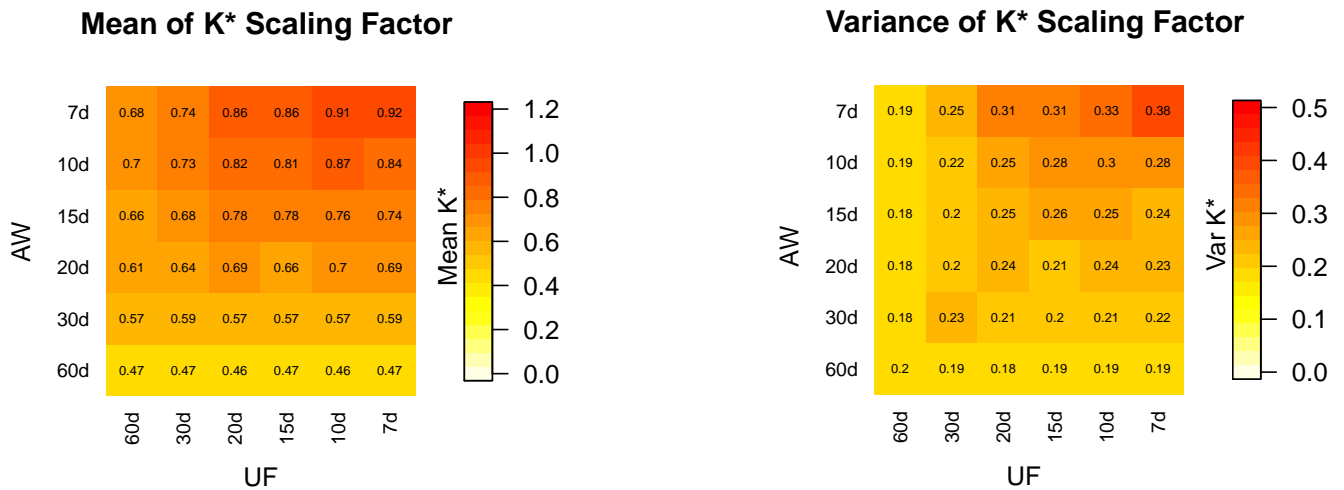

Figure S2. Summary statistics of  $K^*$  values during 20 years of simulations under different schemes.

|           | ECHAM Forecasts |           |        |        |        |        |        |
|-----------|-----------------|-----------|--------|--------|--------|--------|--------|
|           | OL              | DA [A.W.] |        |        |        |        |        |
|           |                 | -2m       | -1m    | -20d   | -15d   | -10d   | -7d    |
| NSE       | 0.21            | +0.073    | +0.079 | +0.084 | +0.084 | +0.081 | +0.081 |
| KGE       | 0.41            | +0.020    | +0.017 | +0.023 | +0.016 | +0.005 | +0.003 |
| RANK CORR | 0.75            | +0.015    | +0.015 | +0.022 | +0.028 | +0.006 | -0.003 |
| RRMSE     | 1.04            | +0.049    | +0.053 | +0.057 | +0.057 | +0.055 | +0.055 |
| %BIAS     | 23.20           | +0.865    | +0.776 | +0.761 | +0.744 | +0.714 | +0.696 |

|           | Ensemble Mean from ESP |           |         |         |         |         |         |
|-----------|------------------------|-----------|---------|---------|---------|---------|---------|
|           | OL                     | DA [A.W.] |         |         |         |         |         |
|           |                        | -2m       | -1m     | -20d    | -15d    | -10d    | -7d     |
| NSE       | 0.10                   | +0.092    | +0.117  | +0.126  | +0.130  | +0.127  | +0.137  |
| KGE       | 0.27                   | +0.048    | +0.073  | +0.084  | +0.080  | +0.075  | +0.078  |
| RANK CORR | 0.73                   | +0.008    | +0.006  | +0.015  | +0.015  | -0.017  | -0.017  |
| RRMSE     | 1.11                   | +0.058    | +0.075  | +0.081  | +0.084  | +0.082  | +0.088  |
| %BIAS     | 38.48                  | +13.900   | +23.388 | +25.150 | +26.803 | +29.600 | +32.021 |

Figure S3. Performance of deterministic monthly streamflow forecasting using (un)updated model states from (OL)DA simulation schemes. The verification metrics of DA-aided forecasts are shown for different assimilation window lengths. This table shows a detailed information regarding Table2.

|     | >Q <sub>67</sub> |           |          |          |          |          |          |
|-----|------------------|-----------|----------|----------|----------|----------|----------|
|     | OL               | DA [A.W.] |          |          |          |          |          |
|     |                  | -2m       | -1m      | -20d     | -15d     | -10d     | -7d      |
| BS  | 0.185            | ↑ +0.014  | ↑ +0.015 | ↑ +0.020 | ↑ +0.021 | ↑ +0.018 | ↑ +0.025 |
| REL | 0.045            | ↑ +0.002  | ↑ +0.015 | ↑ +0.021 | ↑ +0.017 | ↑ +0.024 | ↑ +0.024 |
| RES | 0.065            | ↓ -0.000  | ↑ +0.009 | ↑ +0.010 | ↑ +0.005 | ↑ +0.017 | ↑ +0.009 |

|     | <Q <sub>33</sub> |           |          |          |          |          |          |
|-----|------------------|-----------|----------|----------|----------|----------|----------|
|     | OL               | DA [A.W.] |          |          |          |          |          |
|     |                  | -2m       | -1m      | -20d     | -15d     | -10d     | -7d      |
| BS  | 0.186            | ↑ +0.023  | ↑ +0.040 | ↑ +0.050 | ↑ +0.055 | ↑ +0.050 | ↑ +0.051 |
| REL | 0.059            | ↑ +0.021  | ↑ +0.029 | ↑ +0.024 | ↑ +0.041 | ↑ +0.032 | ↑ +0.036 |
| RES | 0.094            | ↓ -0.002  | ↑ +0.010 | ↑ +0.024 | ↑ +0.007 | ↑ +0.014 | ↑ +0.013 |

|     | >Q <sub>90</sub> |           |          |          |          |          |          |
|-----|------------------|-----------|----------|----------|----------|----------|----------|
|     | OL               | DA [A.W.] |          |          |          |          |          |
|     |                  | -2m       | -1m      | -20d     | -15d     | -10d     | -7d      |
| BS  | 0.106            | ↓ -0.008  | ↓ -0.001 | ↓ 0.000  | ↑ 0.002  | ↑ 0.005  | ↑ 0.008  |
| REL | 0.049            | ↓ -0.002  | ↑ 0.007  | ↑ 0.002  | ↑ 0.007  | ↑ 0.013  | ↑ 0.018  |
| RES | 0.030            | ↓ -0.012  | ↓ -0.018 | ↓ -0.015 | ↓ -0.017 | ↓ -0.017 | ↓ -0.023 |

|     | <Q <sub>10</sub> |           |          |          |          |          |          |
|-----|------------------|-----------|----------|----------|----------|----------|----------|
|     | OL               | DA [A.W.] |          |          |          |          |          |
|     |                  | -2m       | -1m      | -20d     | -15d     | -10d     | -7d      |
| BS  | 0.085            | ↑ 0.003   | ↑ 0.009  | ↑ 0.012  | ↑ 0.010  | ↑ 0.009  | ↑ 0.009  |
| REL | 0.034            | ↑ 0.010   | ↑ 0.018  | ↑ 0.022  | ↑ 0.021  | ↑ 0.029  | ↑ 0.030  |
| RES | 0.043            | ↓ -0.008  | ↓ -0.011 | ↓ -0.012 | ↓ -0.016 | ↓ -0.026 | ↓ -0.029 |

Figure S4. Performance of probabilistic monthly streamflow forecasting through ESP using (un)updated model states from (OL)DA simulation schemes assessed on different categories of flows. The verification metrics of DA-aided forecasts are shown for different assimilation window lengths. This table shows a detailed information regarding Table3.
